# Supplementary material for: Plasma metabolic signatures reveal the regulatory effect of exercise training in db / db mice
Source: Royal Society of Chemistry journal article supplement (doi:10.1039/c5mb00363f), 2015-07-23
Supplement: c5mb00363f1.pdf [file c5mb00363f1.pdf]

**Electronic supplementary information.**

**Figure legends**

Supplementary table 1 LC elution gradient in both positive and negative ionization modes.

Supplementary table 2 Method validation results of stability and repeatability in this study.

Supplementary Fig. 1 PCA score plots of pair comparisons between different groups both in positive and negative ionization modes.

Supplementary Fig. 2 PCA score plots of all four groups in positive and negative ionization modes.

Supplementary Table 1. LC elution gradient in positive and negative ion modes.

| No. | Positive ion mode |       | Negative ion mode |        |
|-----|-------------------|-------|-------------------|--------|
|     | Time (min)        | B%    | Time (min)        | B%     |
| 1   | 0.0               | 2.0%  | 0.0               | 0.0%   |
| 2   | 2.0               | 2.0%  | 2.0               | 0.0%   |
| 3   | 14.0              | 55.0% | 9.0               | 50.0%  |
| 4   | 20.0              | 98.0% | 16.0              | 100.0% |
| 5   | 24.0              | 98.0% | 20.0              | 100.0% |

Supplementary Table 2. Results of method validation of stability and repeatability.

| Compounds          | Stability   |             | Repeatability |             |
|--------------------|-------------|-------------|---------------|-------------|
|                    | Area (RSD%) | R.T. (RSD%) | Area (RSD%)   | R.T. (RSD%) |
| L-Lysine           | 1.58        | 1.28        | 6.14          | 1.36        |
| Pantothenic acid   | 3.34        | 0.33        | 1.35          | 0.3         |
| Palmitoylcarnitine | 7.66        | 0.07        | 4.05          | 0.11        |
| 12-HETE            | 6.13        | 0.04        | 3.64          | 0.04        |
| N-Acetylleucine    | 5.75        | 0.35        | 7.78          | 0.21        |

Supplementary Fig. 1. PCA score plots of pair comparisons between different groups both in positive and negative ionization mode.

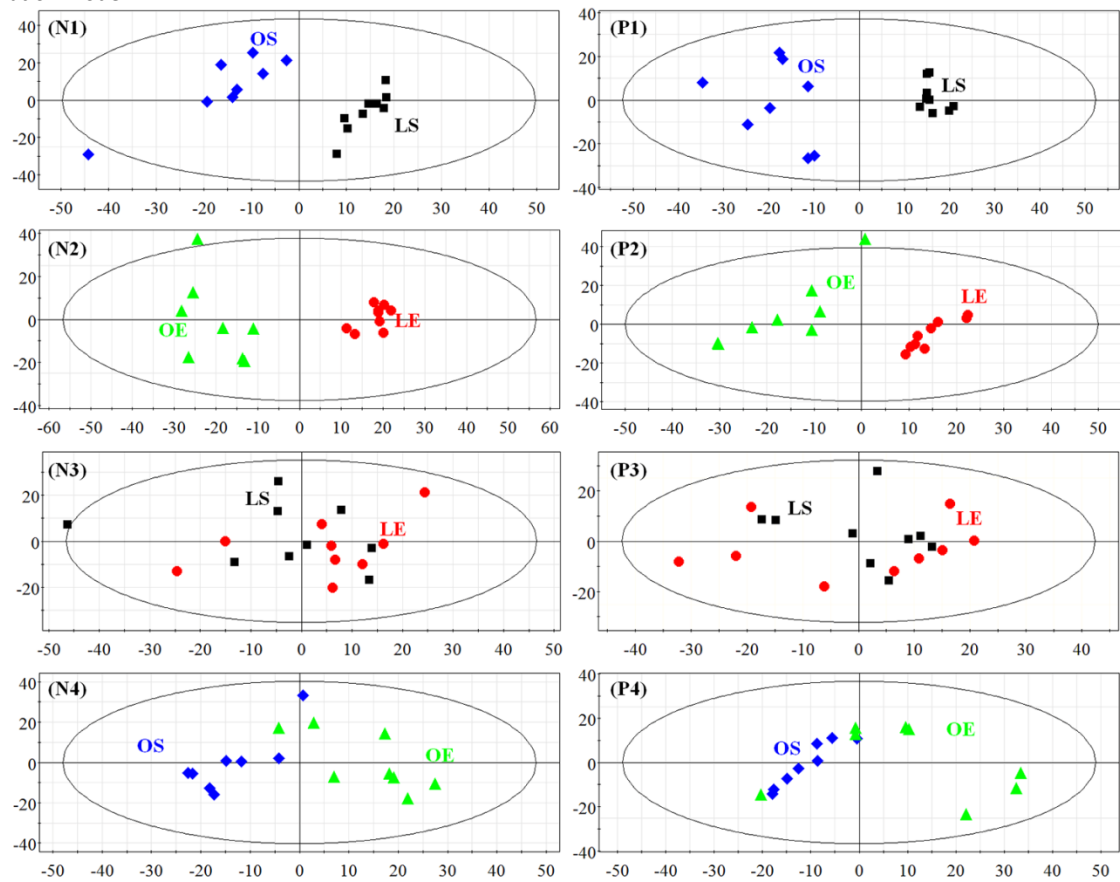

Note: N1-4: PCA score plots in negative ionization mode. P1-4: PCA score plots in positive ionization mode. LS: *db/m+* mice treated with sedentary, black square; LE: *db/m+* mice treated with exercise training, red dot; OS: *db/db* mice treated with sedentary, blue diamond; OE: *db/db* mice treated with exercise training, green triangle.

Supplementary Fig. 2. PCA score plots of all four groups in positive and negative ionization mode.

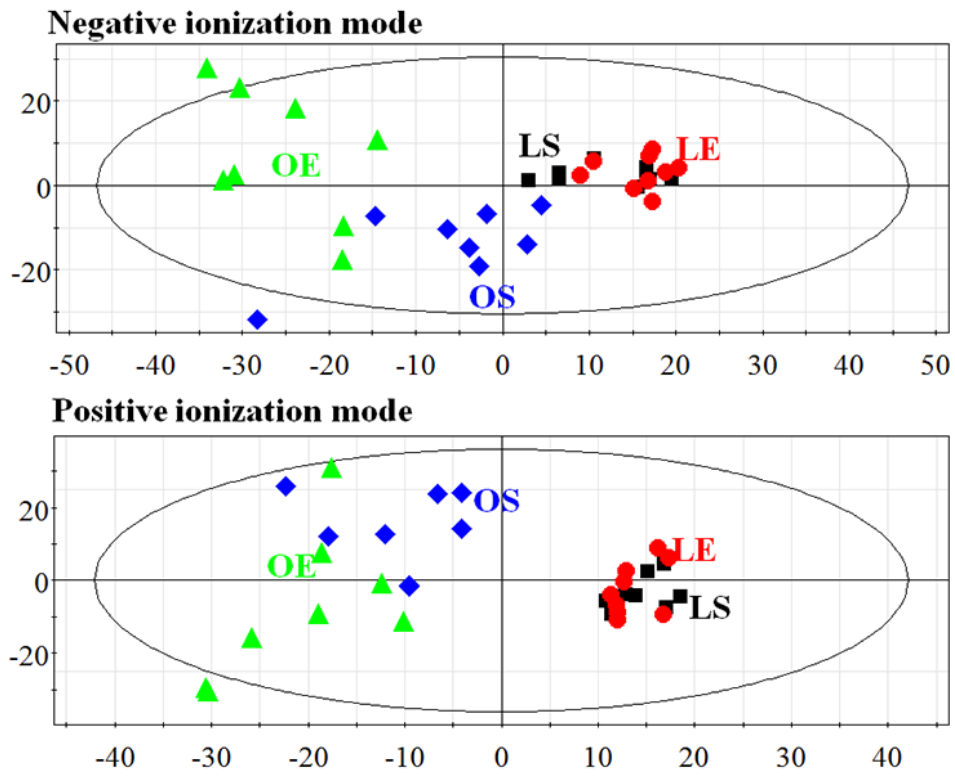

Note: LS: *db/m+* mice treated with sedentary, black square; LE: *db/m+* mice treated with exercise training, red dot; OS: *db/db* mice treated with sedentary, blue diamond; OE: *db/db* mice treated with exercise training, green triangle.
